# Supplementary material for: The whole body transcriptome of Coleophora obducta reveals important olfactory proteins
Source: PeerJ. 2020 Apr 10;8:e8902. doi: 10.7717/peerj.8902 (PMC7153557; doi:10.7717/peerj.8902)
Supplement: Supplemental Information 3 [file peerj-08-8902-s003.docx]

**The whole body transcriptome of *Coleophora obducta* reveals important olfactory proteins**

Dongbai Wang2, Jing Tao3, Pengfei Lu3, Youqing Luo3, Ping Hu1,2

1 Guangxi University, Nanning, Guangxi, China

2 Xingan Vocational and Technical College, Xinganmeng, Inner mongolia, China

3 Beijing Key Laboratory for Forest Pest Control, Beijing Forestry University, Beijing, China

**Supplementary file 3**

**Primer used for fluorescence quantitative real-time PCR**

| Name | Forward primer | Reverse primer |
| --- | --- | --- |
| β-actin | AGAAGCACTTGCGGTGGACAAT | ACCTGTACGCCAACACTGTCAT |
| CobdPBP1 | GAAGAAACTGACGATGGGATT | CAGGTCGAACTTGGAGGC |
| CobdPBP2 | AAGTGTTAGTAAATGTGGTGGTGT | CAAGAAGGTTGAGTTTGTGGC |
| CobdPBP3 | TGGCTCCTGATGAAGTGCT | AAGTGGTCCCGATAACGAA |
